# Supplementary material for: An Accurate Representation of the Number of bZIP Transcription Factors in the Triticum aestivum (Wheat) Genome and the Regulation of Functional Genes during Salt Stress
Source: MDPI journal article supplement (doi:10.3390/cimb46050268), 2024-05-07
Supplement: s1 [file s1]

**Supplementary Table S1. Primers for the qPCR expression analyses**

| <b>bZIP transcription factor primers and actin primers</b> |                    |                               |                               |
|------------------------------------------------------------|--------------------|-------------------------------|-------------------------------|
| <b>bZIP TF</b>                                             | <b>Gene</b>        | <b>Forward Primer (5'-3')</b> | <b>Reverse Primer (5'-3')</b> |
| ABF2                                                       | TraesCS5D02G244500 | GGACCTGAACGAGGAACTGG          | CCGTCCGAACTGATCCTTCA          |
| ABF4                                                       | TraesCS5A02G237200 | ACTGGTGAGGAAACAGGCAG          | CCGTCCGAACTGATCCTTCA          |
| ABI5                                                       | TraesCS1A02G306300 | GAGCGCATTGGTTACAGCAG          | TGGCTGAGGACCCAAATGAC          |
| EMBP-1                                                     | TraesCS2B02G269600 | TGAGAAGGGCAGTTCTGCTG          | TCTCGTGTCTGAGGACTCGT          |
| VIP1                                                       | TraesCS5B02G124200 | GCCACTACGCTATCAGCACA          | CTCCATGGACTGCAACCGAA          |
| Actin                                                      | TraesCS1A02G274400 | TCTATTTTGGCCTCTCTTAGCAC       | TTTCCTGTACCCCTTATTCCTC        |

| <b>bZIP target gene primers</b> |                    |                               |                               |
|---------------------------------|--------------------|-------------------------------|-------------------------------|
| <b>bZIP TF</b>                  | <b>Target gene</b> | <b>Forward Primer (5'-3')</b> | <b>Reverse Primer (5'-3')</b> |
| ABF2                            | TraesCS7D02G060400 | CCATCCCTTCCACACTGTCC          | CTTGGGATGTCGCCTGTGAG          |
|                                 | TraesCS3B02G439600 | ATCATGCACGAGTACCGCC           | CACAGCACCCAGTCATCCAA          |
| ABF4                            | TraesCS6D02G333600 | ACGAGAGAGGAGCACAAGGC          | CCCATGCCATCATCCTCAGAC         |
| ABI5                            | TraesCS3A02G242100 | CCCCAAGGATAGACCAACGG          | GGCAGGATGGTTCTCTCTCT          |
|                                 | TraesCS2A02G456100 | ATTTCGGCCTCTCCGTCTTC          | CAGCACTTCTGGGGCTACAT          |
| EMBP-1                          | TraesCS5B02G490600 | CATCAAGGAGCGGAAGCGT           | CATCTCGAACCCCAGCCC            |
| VIP1                            | TraesCS2B02G372900 | ATGCTCCTGCTCACCATTCC          | TCCCACGGGAGTACTTCACA          |
|                                 | TraesCS3A02G289300 | CGTGTCCGAAGCTGGGTATT          | GCACACGTTTGCCACTCATC          |

**Supplementary Table S2.** The phylogentic tree was constructed using 258, 83, 45 protein sequences in the wheat, rice, and Arabidopsis genome, respectively.

*Triticum aestivum* (wheat)

| Name    | Gene ID                       | Name                          | Gene ID |
|---------|-------------------------------|-------------------------------|---------|
| bZIP_1  | TraesCSU02G019200.1 248 -310  | TraesCSU02G019200.1 248 -310  | Grp G   |
| bZIP_2  | TraesCS5D02G415300.1 63 - 113 | TraesCS5D02G415300.1 63 - 113 | Grp S   |
| bZIP_3  | TraesCS5D02G473000.2 255 -318 | TraesCS5D02G473000.2 255 -318 | Grp G   |
| bZIP_4  | TraesCS6A02G087400.1 220 -282 | TraesCS6A02G087400.1 220 -282 | Grp G   |
| bZIP_5  | TraesCS6A02G087400.2 251 -313 | TraesCS6A02G087400.2 251 -313 | Grp G   |
| bZIP_6  | TraesCS5B02G410000.1 62 - 114 | TraesCS5B02G410000.1 62 - 114 | Grp S   |
| bZIP_7  | TraesCS5B02G470600.1 251 -314 | TraesCS5B02G470600.1 251 -314 | Grp G   |
| bZIP_8  | TraesCS4A02G198100.1 127 -189 | TraesCS4A02G198100.1 127 -189 | Grp H   |
| bZIP_9  | TraesCS2A02G245700.1 258 -320 | TraesCS2A02G245700.1 258 -320 | Grp G   |
| bZIP_10 | TraesCS1B02G439800.1 263 -325 | TraesCS1B02G439800.1 263 -325 | Grp G   |
| bZIP_11 | TraesCS1D02G417100.1 263 -325 | TraesCS1D02G417100.1 263 -325 | Grp G   |
| bZIP_12 | TraesCS5D02G124600.1 291 -353 | TraesCS5D02G124600.1 291 -353 | Grp G   |
| bZIP_13 | TraesCS4D02G230200.1 280 -342 | TraesCS4D02G230200.1 280 -342 | Grp G   |
| bZIP_14 | TraesCS5D02G134100.1 114 -176 | TraesCS5D02G134100.1 114 -176 | Grp H   |
| bZIP_15 | TraesCS6B02G110100.1 250 -312 | TraesCS6B02G110100.1 250 -312 | Grp G   |
| bZIP_16 | TraesCS2B02G269600.1 259 -321 | TraesCS2B02G269600.1 259 -321 | Grp G   |
| bZIP_17 | TraesCS5A02G460800.1 249 -312 | TraesCS5A02G460800.1 249 -312 | Grp G   |
| bZIP_18 | TraesCS4B02G117400.1 128 -190 | TraesCS4B02G117400.1 128 -190 | Grp H   |
| bZIP_19 | TraesCS4B02G117400.2 221 -283 | TraesCS4B02G117400.2 221 -283 | Grp H   |
| bZIP_20 | TraesCS5A02G126600.1 114 -176 | TraesCS5A02G126600.1 114 -176 | Grp G   |
| bZIP_21 | TraesCS5B02G122000.1 269 -331 | TraesCS5B02G122000.1 269 -331 | Grp G   |
| bZIP_22 | TraesCS5B02G125800.1 114 -176 | TraesCS5B02G125800.1 114 -176 | Grp G   |
| bZIP_23 | TraesCS2D02G236200.1 258 -320 | TraesCS2D02G236200.1 258 -320 | Grp G   |
| bZIP_24 | TraesCS4B02G229100.2 323 -385 | TraesCS4B02G229100.2 323 -385 | Grp G   |
| bZIP_25 | TraesCS7D02G349300.1 128 -189 | TraesCS7D02G349300.1 128 -189 | GrpB    |
| bZIP_26 | TraesCS5D02G258000.1 89 - 144 | TraesCS5D02G258000.1 89 - 144 | Grp S   |
| bZIP_27 | TraesCS5D02G273500.1 206 -237 | TraesCS6A02G175800.1 81 - 142 | GrpB    |
| bZIP_28 | TraesCS6A02G175800.1 81 - 142 | TraesCS7D02G182900.1 105 -154 | Grp S   |
| bZIP_29 | TraesCS7D02G182900.1 105 -154 | TraesCS7A02G181100.1 106 -156 | Grp S   |
| bZIP_30 | TraesCS7A02G181100.1 106 -156 | TraesCS7A02G373800.1 83 - 144 | GrpB    |
| bZIP_31 | TraesCS7A02G373800.1 83 - 144 | TraesCS6B02G209600.1 81 - 142 | Grp H   |
| bZIP_32 | TraesCS6B02G209600.1 81 - 142 | TraesCS7B02G086100.1 105 -154 | Grp S   |
| bZIP_33 | TraesCS7B02G086100.1 105 -154 | TraesCS3A02G128900.1 88 - 149 | Grp H   |
| bZIP_34 | TraesCS3A02G128900.1 88 - 149 | TraesCS5A02G250400.1 90 - 145 | Grp S   |
| bZIP_35 | TraesCS5A02G250400.1 90 - 145 | TraesCS6D02G167800.1 81 - 142 | Grp H   |
| bZIP_36 | TraesCS5A02G265600.1 207 -238 | TraesCS5B02G248400.1 90 - 145 | Grp S   |
| bZIP_37 | TraesCS6D02G167800.1 81 - 142 | TraesCS7B02G293900.1 72 - 122 | Grp S   |
| bZIP_38 | TraesCS5B02G248400.1 90 - 145 | TraesCS6D02G270000.1 103 -160 | Grp S   |
| bZIP_39 | TraesCS5B02G265300.1 214 -245 | TraesCS7D02G213200.1 86 - 134 | Grp S   |
| bZIP_40 | TraesCS5B02G265300.2 214 -245 | TraesCS6A02G288900.1 101 -152 | Grp S   |
| bZIP_41 | TraesCS7B02G293900.1 72 - 122 | TraesCS1B02G268500.1 174 -234 | GrpB    |
| bZIP_42 | TraesCS6D02G270000.1 103 -160 | TraesCS1B02G282800.1 170 -229 | Grp A   |

|         |                               |                               |       |
|---------|-------------------------------|-------------------------------|-------|
| bZIP_43 | TraesCS7D02G213200.1 86 - 134 | TraesCS1D02G257400.1 177 -237 | GrpB  |
| bZIP_44 | TraesCS6A02G288900.1 101 -152 | TraesCS2A02G142800.1 125 -185 | Grp A |
| bZIP_45 | TraesCS1B02G268500.1 174 -234 | TraesCS1D02G273100.1 170 -229 | Grp A |
| bZIP_46 | TraesCS1B02G282800.1 170 -229 | TraesCS7A02G211500.1 87 - 135 | Grp S |
| bZIP_47 | TraesCS1D02G257400.1 177 -237 | TraesCS3A02G330800.1 70 - 118 | Grp F |
| bZIP_48 | TraesCS2A02G142800.1 125 -185 | TraesCS5D02G068800.1 106 -160 | Grp C |
| bZIP_49 | TraesCS1D02G273100.1 170 -229 | TraesCS3A02G378700.1 175 -235 | Grp A |
| bZIP_50 | TraesCS7A02G211500.1 87 - 135 | TraesCS2B02G167900.1 122 -182 | GrpB  |
| bZIP_51 | TraesCS3A02G330800.1 70 - 118 | TraesCS7A02G391800.1 147 -198 | Grp S |
| bZIP_52 | TraesCS5D02G068800.1 106 -160 | TraesCS5D02G150700.1 241 -289 | Grp A |
| bZIP_53 | TraesCS3A02G378700.1 175 -235 | TraesCS5D02G150700.2 241 -287 | Grp A |
| bZIP_54 | TraesCS2B02G167900.1 122 -182 | TraesCS1A02G273000.2 117 -176 | Grp A |
| bZIP_55 | TraesCS7A02G391800.1 147 -198 | TraesCS6B02G318700.1 104 -161 | Grp S |
| bZIP_56 | TraesCS5D02G150700.1 241 -289 | TraesCS5A02G057500.1 106 -160 | Grp C |
| bZIP_57 | TraesCS5D02G150700.2 241 -287 | TraesCS2D02G146100.1 123 -183 | Grp A |
| bZIP_58 | TraesCS1A02G273000.2 117 -176 | TraesCS5B02G059200.1 106 -160 | Grp C |
| bZIP_59 | TraesCS6B02G318700.1 104 -161 | TraesCS7B02G118500.1 86 - 134 | Grp S |
| bZIP_60 | TraesCS5A02G057500.1 106 -160 | TraesCS5A02G141500.1 241 -287 | Grp A |
| bZIP_61 | TraesCS2D02G146100.1 123 -183 | TraesCS5B02G139800.1 241 -287 | Grp A |
| bZIP_62 | TraesCS5B02G059200.1 106 -160 | TraesCS3D02G324200.1 71 - 119 | Grp F |
| bZIP_63 | TraesCS7B02G118500.1 86 - 134 | TraesCS3D02G371900.1 168 -228 | Grp A |
| bZIP_64 | TraesCS5A02G141500.1 241 -287 | TraesCS7D02G475100.1 143 -194 | Grp C |
| bZIP_65 | TraesCS5B02G139800.1 241 -287 | TraesCS5D02G338000.1 129 -182 | Grp A |
| bZIP_66 | TraesCS3D02G324200.1 71 - 119 | TraesCS7B02G391800.1 144 -195 | Grp C |
| bZIP_67 | TraesCS3D02G371900.1 168 -228 | TraesCS7B02G464700.1 94 - 149 | Grp A |
| bZIP_68 | TraesCS7D02G475100.1 143 -194 | TraesCS6A02G154600.1 137 -188 | Grp C |
| bZIP_69 | TraesCS5D02G338000.1 129 -182 | TraesCS5B02G332300.1 129 -182 | Grp A |
| bZIP_70 | TraesCS7B02G391800.1 144 -195 | TraesCS4A02G291200.1 55 - 102 | Grp S |
| bZIP_71 | TraesCS7B02G464700.1 94 - 149 | TraesCS5A02G332000.1 134 -187 | Grp A |
| bZIP_72 | TraesCS6A02G154600.1 137 -188 | TraesCS7A02G488600.1 146 -197 | Grp C |
| bZIP_73 | TraesCS6A02G165800.1 160 -200 | TraesCS6B02G182500.1 136 -187 | Grp C |
| bZIP_74 | TraesCS5B02G332300.1 129 -182 | TraesCS2D02G536700.1 106 -150 | Grp A |
| bZIP_75 | TraesCS4A02G291200.1 55 - 102 | TraesCS6D02G144400.1 135 -186 | Grp C |
| bZIP_76 | TraesCS3A02G372400.3 244 -279 | TraesCS7D02G268400.1 174 -232 | Grp I |
| bZIP_77 | TraesCS5A02G332000.1 134 -187 | TraesCS7D02G269300.1 318 -367 | Grp I |
| bZIP_78 | TraesCS2B02G556600.1 133 -173 | TraesCS7D02G392800.1 143 -199 | GrpB  |
| bZIP_79 | TraesCS7A02G488600.1 146 -197 | TraesCS5D02G244500.2 274 -324 | Grp A |
| bZIP_80 | TraesCS6B02G182500.1 136 -187 | TraesCS7B02G299200.1 143 -199 | GrpB  |
| bZIP_81 | TraesCS6B02G193200.1 151 -182 | TraesCS5D02G308600.1 177 -235 | Grp I |
| bZIP_82 | TraesCS2D02G529000.1 124 -164 | TraesCS5D02G315400.1 329 -383 | Grp E |
| bZIP_83 | TraesCS2D02G536700.1 106 -150 | TraesCS5D02G447500.1 219 -269 | Grp C |
| bZIP_84 | TraesCS2A02G526300.1 122 -162 | TraesCS6D02G312800.1 281 -326 | Grp A |
| bZIP_85 | TraesCS3D02G365200.2 251 -286 | TraesCS6A02G170600.1 82 - 128 | Grp S |
| bZIP_86 | TraesCS6D02G144400.1 135 -186 | TraesCS5B02G301900.1 177 -235 | Grp I |
| bZIP_87 | TraesCS6D02G154400.1 160 -200 | TraesCS5B02G308800.1 329 -383 | Grp E |
| bZIP_88 | TraesCS7D02G268400.1 174 -232 | TraesCS1B02G193800.1 243 -298 | Grp I |
| bZIP_89 | TraesCS7D02G269300.1 318 -367 | TraesCS7D02G171300.1 265 -316 | Grp A |
| bZIP_90 | TraesCS7D02G392800.1 143 -199 | TraesCS4A02G128900.1 155 -197 | Grp A |

|          |                               |                               |       |
|----------|-------------------------------|-------------------------------|-------|
| bZIP_91  | TraesCS5D02G244500.2 274 -324 | TraesCS4A02G135600.2 160 -214 | Grp I |
| bZIP_92  | TraesCS7B02G299200.1 143 -199 | TraesCS1D02G191000.1 242 -297 | Grp I |
| bZIP_93  | TraesCS5D02G308600.1 177 -235 | TraesCS5B02G444100.2 212 -262 | Grp C |
| bZIP_94  | TraesCS5D02G315400.1 329 -383 | TraesCS4A02G183400.1 234 -270 | Grp F |
| bZIP_95  | TraesCS5D02G447500.1 219 -269 | TraesCS1B02G285800.2 215 -243 | Grp D |
| bZIP_96  | TraesCS6D02G312800.1 281 -326 | TraesCS6A02G333600.1 271 -316 | Grp A |
| bZIP_97  | TraesCS6A02G170600.1 82 - 128 | TraesCS7A02G170600.1 263 -314 | Grp A |
| bZIP_98  | TraesCS5B02G301900.1 177 -235 | TraesCS4A02G209900.1 168 -222 | Grp E |
| bZIP_99  | TraesCS5B02G308800.1 329 -383 | TraesCS1B02G317100.1 252 -295 | Grp A |
| bZIP_100 | TraesCS1B02G193800.1 243 -298 | TraesCS1D02G276100.1 215 -243 | Grp D |
| bZIP_101 | TraesCS7D02G171300.1 265 -316 | TraesCS3A02G293700.1 139 -184 | Grp E |
| bZIP_102 | TraesCS4A02G128900.1 155 -197 | TraesCS7A02G207100.1 159 -200 | Grp F |
| bZIP_103 | TraesCS4A02G135600.2 160 -214 | TraesCS1B02G343500.1 211 -256 | Grp C |
| bZIP_104 | TraesCS1D02G191000.1 242 -297 | TraesCS1D02G306000.1 257 -300 | Grp A |
| bZIP_105 | TraesCS5B02G444100.2 212 -262 | TraesCS3A02G334100.1 190 -230 | Grp F |
| bZIP_106 | TraesCS4A02G183400.1 234 -270 | TraesCS2B02G115700.1 179 -225 | Grp A |
| bZIP_107 | TraesCS1B02G285800.2 215 -243 | TraesCS1D02G332200.1 206 -252 | Grp C |
| bZIP_108 | TraesCS6A02G333600.1 271 -316 | TraesCS2B02G122700.1 165 -209 | Grp I |
| bZIP_109 | TraesCS7A02G170600.1 263 -314 | TraesCS7A02G266400.1 171 -229 | Grp I |
| bZIP_110 | TraesCS4A02G209900.1 168 -222 | TraesCS7A02G268700.1 318 -367 | Grp I |
| bZIP_111 | TraesCS1B02G317100.1 252 -295 | TraesCS3A02G371800.1 307 -355 | Grp A |
| bZIP_112 | TraesCS1D02G276100.1 215 -243 | TraesCS3A02G372000.1 298 -344 | Grp A |
| bZIP_113 | TraesCS3A02G293700.1 139 -184 | TraesCS3A02G372200.1 298 -345 | Grp A |
| bZIP_114 | TraesCS7A02G207100.1 159 -200 | TraesCS3A02G372400.2 261 -295 | Grp S |
| bZIP_115 | TraesCS1B02G343500.1 211 -256 | TraesCS2B02G165700.1 177 -227 | Grp D |
| bZIP_116 | TraesCS1D02G306000.1 257 -300 | TraesCS7A02G398400.1 143 -199 | GrpB  |
| bZIP_117 | TraesCS3A02G334100.1 190 -230 | TraesCS5D02G132300.1 163 -221 | Grp E |
| bZIP_118 | TraesCS2B02G115700.1 179 -225 | TraesCS2B02G523600.1 95 - 140 | Grp A |
| bZIP_119 | TraesCS1D02G332200.1 206 -252 | TraesCS5D02G148700.1 112 -160 | Grp E |
| bZIP_120 | TraesCS2B02G122700.1 165 -209 | TraesCS1A02G186000.1 246 -301 | Grp I |
| bZIP_121 | TraesCS7A02G266400.1 171 -229 | TraesCS2B02G564900.1 106 -149 | Grp A |
| bZIP_122 | TraesCS7A02G268700.1 318 -367 | TraesCS2A02G352100.1 168 -224 | Grp I |
| bZIP_123 | TraesCS3A02G371800.1 307 -355 | TraesCS5A02G440400.1 204 -254 | Grp C |
| bZIP_124 | TraesCS3A02G372000.1 298 -344 | TraesCS4D02G316900.1 110 -164 | Grp I |
| bZIP_125 | TraesCS3A02G372200.1 298 -345 | TraesCS6B02G198700.1 82 - 128 | Grp S |
| bZIP_126 | TraesCS3A02G372400.2 261 -295 | TraesCS2A02G099400.1 179 -225 | Grp A |
| bZIP_127 | TraesCS2B02G165700.1 177 -227 | TraesCS3D02G148200.1 175 -225 | Grp D |
| bZIP_128 | TraesCS7A02G398400.1 143 -199 | TraesCS2A02G105700.1 163 -207 | Grp I |
| bZIP_129 | TraesCS5D02G132300.1 163 -221 | TraesCS5A02G491600.1 102 -156 | Grp I |
| bZIP_130 | TraesCS2B02G523600.1 95 - 140 | TraesCS1A02G306300.1 254 -297 | Grp A |
| bZIP_131 | TraesCS5D02G148700.1 112 -160 | TraesCS2D02G495700.1 111 -156 | Grp A |
| bZIP_132 | TraesCS1A02G186000.1 246 -301 | TraesCS1A02G329900.1 211 -249 | Grp C |
| bZIP_133 | TraesCS2B02G564900.1 106 -149 | TraesCS2D02G098700.1 179 -225 | Grp A |
| bZIP_134 | TraesCS5D02G178800.1 179 -207 | TraesCS2D02G105400.1 163 -207 | Grp E |
| bZIP_135 | TraesCS2A02G352100.1 168 -224 | TraesCS2D02G105400.2 163 -207 | Grp I |
| bZIP_136 | TraesCS5A02G440400.1 204 -254 | TraesCS6B02G364000.1 272 -317 | Grp A |
| bZIP_137 | TraesCS4D02G316900.1 110 -164 | TraesCS2D02G536800.1 109 -152 | Grp A |
| bZIP_138 | TraesCS6B02G198700.1 82 - 128 | TraesCS2A02G495400.1 111 -156 | Grp A |

|          |                      |          |                      |          |       |
|----------|----------------------|----------|----------------------|----------|-------|
| bZIP_139 | TraesCS2A02G099400.1 | 179 -225 | TraesCS7B02G075600.1 | 260 -311 | Grp A |
| bZIP_140 | TraesCS3D02G148200.1 | 175 -225 | TraesCS2D02G144300.1 | 177 -227 | Grp D |
| bZIP_141 | TraesCS2A02G105700.1 | 163 -207 | TraesCS2A02G534200.1 | 107 -150 | Grp A |
| bZIP_142 | TraesCS1A02G276600.1 | 215 -243 | TraesCS2A02G534300.1 | 94 - 137 | Grp A |
| bZIP_143 | TraesCS5A02G491600.1 | 102 -156 | TraesCS4B02G113400.1 | 168 -222 | Grp E |
| bZIP_144 | TraesCS1A02G306300.1 | 254 -297 | TraesCS7B02G114300.1 | 164 -205 | Grp D |
| bZIP_145 | TraesCS2D02G495700.1 | 111 -156 | TraesCS3B02G167500.1 | 163 -212 | Grp D |
| bZIP_146 | TraesCS1A02G329900.1 | 211 -249 | TraesCS5A02G124600.1 | 163 -221 | Grp E |
| bZIP_147 | TraesCS2D02G098700.1 | 179 -225 | TraesCS5A02G143300.1 | 112 -160 | Grp E |
| bZIP_148 | TraesCS2D02G105400.1 | 163 -207 | TraesCS4B02G169600.1 | 160 -214 | Grp I |
| bZIP_149 | TraesCS2D02G105400.2 | 163 -207 | TraesCS3D02G293500.1 | 144 -189 | Grp D |
| bZIP_150 | TraesCS6B02G364000.1 | 272 -317 | TraesCS7B02G166100.1 | 175 -233 | Grp I |
| bZIP_151 | TraesCS2D02G536800.1 | 109 -152 | TraesCS4B02G175800.1 | 155 -197 | Grp A |
| bZIP_152 | TraesCS2A02G495400.1 | 111 -156 | TraesCS5B02G124200.1 | 163 -221 | Grp E |
| bZIP_153 | TraesCS7B02G075600.1 | 260 -311 | TraesCS5B02G142200.1 | 112 -160 | Grp D |
| bZIP_154 | TraesCS2D02G144300.1 | 177 -227 | TraesCS3D02G327600.1 | 192 -232 | Grp D |
| bZIP_155 | TraesCS2A02G534200.1 | 107 -150 | TraesCS3D02G330300.1 | 267 -311 | Grp A |
| bZIP_156 | TraesCS2A02G534300.1 | 94 - 137 | TraesCS3A02G131900.1 | 175 -209 | Grp D |
| bZIP_157 | TraesCS4B02G113400.1 | 168 -222 | TraesCS5A02G237200.2 | 289 -335 | Grp A |
| bZIP_158 | TraesCS7B02G114300.1 | 164 -205 | TraesCS3D02G364900.1 | 306 -354 | Grp A |
| bZIP_159 | TraesCS3B02G167500.1 | 163 -212 | TraesCS5A02G299400.1 | 177 -235 | Grp I |
| bZIP_160 | TraesCS5A02G124600.1 | 163 -221 | TraesCS4B02G320400.1 | 245 -299 | Grp I |
| bZIP_161 | TraesCS4B02G135000.1 | 260 -296 | TraesCS5A02G308400.1 | 372 -426 | Grp E |
| bZIP_162 | TraesCS5A02G143300.1 | 112 -160 | TraesCS6D02G160200.1 | 81 - 127 | Grp S |
| bZIP_163 | TraesCS4B02G169600.1 | 160 -214 | TraesCS5B02G235600.1 | 287 -337 | Grp A |
| bZIP_164 | TraesCS3D02G293500.1 | 144 -189 | TraesCS7D02G527500.1 | 95 - 148 | Grp A |
| bZIP_165 | TraesCS7B02G166100.1 | 175 -233 | TraesCS1B02G323600.1 | 74 - 119 | Grp F |
| bZIP_166 | TraesCS4B02G175800.1 | 155 -197 | TraesCS1D02G312200.1 | 74 - 119 | Grp D |
| bZIP_167 | TraesCS5B02G124200.1 | 163 -221 | TraesCS3A02G371900.1 | 299 -345 | Grp A |
| bZIP_168 | TraesCS5A02G174200.1 | 180 -208 | TraesCS4D02G335000.1 | 109 -158 | Grp A |
| bZIP_169 | TraesCS5B02G142200.1 | 112 -160 | TraesCS7A02G542700.1 | 95 - 148 | Grp A |
| bZIP_170 | TraesCS3D02G327600.1 | 192 -232 | TraesCS5A02G508600.1 | 109 -158 | Grp A |
| bZIP_171 | TraesCS3D02G330300.1 | 267 -311 | TraesCS1A02G311900.1 | 73 - 118 | Grp D |
| bZIP_172 | TraesCS3A02G131900.1 | 175 -209 | TraesCS5B02G017700.1 | 88 - 134 | Grp D |
| bZIP_173 | TraesCS5A02G237200.2 | 289 -335 | TraesCS2B02G489900.1 | 60 - 115 | Grp A |
| bZIP_174 | TraesCS3D02G364900.1 | 306 -354 | TraesCS4B02G338700.1 | 109 -158 | Grp A |
| bZIP_175 | TraesCS3D02G365200.3 | 268 -302 | TraesCS2A02G140900.1 | 179 -227 | Grp D |
| bZIP_176 | TraesCS3D02G365200.5 | 265 -299 | TraesCS5D02G025800.1 | 90 - 135 | Grp D |
| bZIP_177 | TraesCS5A02G299400.1 | 177 -235 | TraesCS5A02G020700.1 | 117 -161 | Grp D |
| bZIP_178 | TraesCS4B02G320400.1 | 245 -299 | TraesCS3D02G365500.1 | 301 -347 | Grp A |
| bZIP_179 | TraesCS5A02G308400.1 | 372 -426 | TraesCS7D02G518100.1 | 93 - 136 | Grp D |
| bZIP_180 | TraesCS6D02G160200.1 | 81 - 127 | TraesCS7B02G447900.1 | 98 - 141 | Grp S |
| bZIP_181 | TraesCS5B02G235600.1 | 287 -337 | TraesCS7A02G420400.1 | 158 -201 | Grp S |
| bZIP_182 | TraesCS7D02G527500.1 | 95 - 148 | TraesCS7A02G530300.1 | 96 - 139 | Grp F |
| bZIP_183 | TraesCS1B02G323600.1 | 74 - 119 | TraesCS3D02G365000.1 | 315 -359 | Grp A |
| bZIP_184 | TraesCS1D02G312200.1 | 74 - 119 | TraesCS5D02G447500.2 | 160 -206 | Grp C |
| bZIP_185 | TraesCS3A02G371900.1 | 299 -345 | TraesCS5B02G444100.1 | 159 -205 | Grp C |
| bZIP_186 | TraesCS4D02G335000.1 | 109 -158 | TraesCS3A02G293700.2 | 178 -219 | Grp D |

|          |                               |                               |       |
|----------|-------------------------------|-------------------------------|-------|
| bZIP_187 | TraesCS7A02G542700.1 95 - 148 | TraesCS5A02G440400.2 153 -199 | Grp C |
| bZIP_188 | TraesCS5A02G508600.1 109 -158 | TraesCS5A02G405200.1 48 - 98  | Grp S |
| bZIP_189 | TraesCS1A02G311900.1 73 - 118 | TraesCS4A02G120500.1 23 - 83  | Grp S |
| bZIP_190 | TraesCS5B02G017700.1 88 - 134 | TraesCS5D02G183500.1 30 - 78  | Grp S |
| bZIP_191 | TraesCS2B02G489900.1 60 - 115 | TraesCS4B02G184500.1 23 - 83  | Grp S |
| bZIP_192 | TraesCS4B02G338700.1 109 -158 | TraesCS5A02G179000.1 30 - 78  | Grp S |
| bZIP_193 | TraesCS2A02G140900.1 179 -227 | TraesCS5B02G176700.1 30 - 80  | Grp C |
| bZIP_194 | TraesCS5D02G025800.1 90 - 135 | TraesCS6A02G096300.1 37 - 78  | Grp S |
| bZIP_195 | TraesCS5A02G020700.1 117 -161 | TraesCS6B02G124700.1 38 - 79  | Grp S |
| bZIP_196 | TraesCS3D02G365500.1 301 -347 | TraesCS3D02G203300.1 32 - 85  | Grp S |
| bZIP_197 | TraesCS7D02G518100.1 93 - 136 | TraesCS3B02G226200.1 27 - 79  | Grp S |
| bZIP_198 | TraesCS7B02G447900.1 98 - 141 | TraesCS6D02G087400.1 39 - 80  | Grp S |
| bZIP_199 | TraesCS7A02G420400.1 158 -201 | TraesCS1B02G091500.1 28 - 81  | Grp S |
| bZIP_200 | TraesCS7A02G530300.1 96 - 139 | TraesCS1D02G075500.1 28 - 81  | Grp S |
| bZIP_201 | TraesCS3D02G365000.1 315 -359 | TraesCS1B02G127400.1 48 - 77  | Grp S |
| bZIP_202 | TraesCS5D02G447500.2 160 -206 | TraesCS1D02G105300.1 48 - 86  | Grp S |
| bZIP_203 | TraesCS5B02G444100.1 159 -205 | TraesCS4A02G126300.1 50 - 91  | Grp D |
| bZIP_204 | TraesCS3A02G293700.2 178 -219 | TraesCS1A02G072600.1 28 - 81  | Grp S |
| bZIP_205 | TraesCS5A02G440400.2 153 -199 | TraesCS2B02G113200.2 51 - 92  | Grp F |
| bZIP_206 | TraesCS5A02G405200.1 48 - 98  | TraesCS1A02G096300.1 49 - 78  | Grp S |
| bZIP_207 | TraesCS4A02G120500.1 23 - 83  | TraesCS5D02G100700.1 30 - 78  | Grp S |
| bZIP_208 | TraesCS5D02G183500.1 30 - 78  | TraesCS4D02G316900.2 19 - 66  | Grp I |
| bZIP_209 | TraesCS4B02G184500.1 23 - 83  | TraesCS2A02G097500.1 48 - 89  | Grp F |
| bZIP_210 | TraesCS5A02G179000.1 30 - 78  | TraesCS3D02G194800.1 46 - 86  | Grp D |
| bZIP_211 | TraesCS5B02G176700.1 30 - 80  | TraesCS2D02G096800.1 48 - 89  | Grp F |
| bZIP_212 | TraesCS6A02G096300.1 37 - 78  | TraesCS5A02G088300.1 30 - 78  | Grp S |
| bZIP_213 | TraesCS6B02G124700.1 38 - 79  | TraesCS5B02G094300.1 30 - 78  | Grp S |
| bZIP_214 | TraesCS3D02G203300.1 32 - 85  | TraesCS3B02G220400.1 46 - 86  | Grp D |
| bZIP_215 | TraesCS3B02G226200.1 27 - 79  | TraesCS4B02G178600.1 50 - 91  | Grp D |
| bZIP_216 | TraesCS6D02G087400.1 39 - 80  | TraesCS3A02G190700.1 46 - 86  | Grp D |
| bZIP_217 | TraesCS1B02G091500.1 28 - 81  | TraesCS3A02G200600.1 33 - 79  | Grp S |
| bZIP_218 | TraesCS1D02G075500.1 28 - 81  | TraesCS4A02G126300.2 53 - 92  | Grp D |
| bZIP_219 | TraesCS1B02G127400.1 48 - 77  | TraesCS4D02G115200.1 127- 189 | Grp G |
| bZIP_220 | TraesCS1D02G105300.1 48 - 86  | TraesCS3D02G129800.1 88 - 149 | Grp H |
| bZIP_221 | TraesCS4A02G126300.1 50 - 91  | TraesCS4D02G185500.1 23 - 83  | Grp S |
| bZIP_222 | TraesCS1A02G072600.1 28 - 81  | TraesCS3B02G360900.1 109- 157 | Grp D |
| bZIP_223 | TraesCS2B02G113200.2 51 - 92  | TraesCS3B02G411300.1 168- 227 | Grp A |
| bZIP_224 | TraesCS1A02G096300.1 49 - 78  | TraesCS4D02G020600.1 55 - 99  | Grp C |
| bZIP_225 | TraesCS5D02G100700.1 30 - 78  | TraesCS4D02G110900.1 167- 221 | Grp E |
| bZIP_226 | TraesCS4D02G316900.2 19 - 66  | TraesCS4D02G171700.2 160- 214 | Grp I |
| bZIP_227 | TraesCS2A02G097500.1 48 - 89  | TraesCS4D02G177700.1 153- 195 | Grp A |
| bZIP_228 | TraesCS3D02G194800.1 46 - 86  | TraesCS4D02G180200.1 50 - 91  | Grp D |
| bZIP_229 | TraesCS2D02G096800.1 48 - 89  | TraesCS3B02G328400.1 144- 189 | Grp D |
| bZIP_230 | TraesCS5A02G088300.1 30 - 78  | TraesCS3B02G365100.1 192- 232 | Grp D |
| bZIP_231 | TraesCS5B02G094300.1 30 - 78  | TraesCS3B02G368300.1 273- 317 | Grp A |
| bZIP_232 | TraesCS3B02G220400.1 46 - 86  | TraesCS3B02G404200.1 306- 362 | Grp A |
| bZIP_233 | TraesCS4B02G178600.1 50 - 91  | TraesCS3B02G404300.1 307- 355 | Grp A |
| bZIP_234 | TraesCS3A02G190700.1 46 - 86  | TraesCS3B02G404400.1 307- 351 | Grp A |

|          |                      |          |                      |          |       |
|----------|----------------------|----------|----------------------|----------|-------|
| bZIP_235 | TraesCS3A02G200600.1 | 33 - 79  | TraesCS3B02G404600.1 | 307- 354 | Grp A |
| bZIP_236 | TraesCS4A02G126300.2 | 53 - 92  | TraesCS3B02G404500.1 | 308- 351 | Grp A |
| bZIP_237 | TraesCS4D02G115200.1 | 127- 189 | TraesCS4D02G180200.4 | 53 - 92  | Grp D |
| bZIP_238 | TraesCS3D02G129800.1 | 88 - 149 |                      |          |       |
| bZIP_239 | TraesCS4D02G185500.1 | 23 - 83  |                      |          |       |
| bZIP_240 | TraesCS3B02G360900.1 | 109- 157 |                      |          |       |
| bZIP_241 | TraesCS3B02G411300.1 | 168- 227 |                      |          |       |
| bZIP_242 | TraesCS3B02G404800.4 | 244- 279 |                      |          |       |
| bZIP_243 | TraesCS4D02G020600.1 | 55 - 99  |                      |          |       |
| bZIP_244 | TraesCS4D02G110900.1 | 167- 221 |                      |          |       |
| bZIP_245 | TraesCS4D02G129900.1 | 232- 268 |                      |          |       |
| bZIP_246 | TraesCS4D02G171700.2 | 160- 214 |                      |          |       |
| bZIP_247 | TraesCS4D02G177700.1 | 153- 195 |                      |          |       |
| bZIP_248 | TraesCS4D02G180200.1 | 50 - 91  |                      |          |       |
| bZIP_249 | TraesCS3B02G328400.1 | 144- 189 |                      |          |       |
| bZIP_250 | TraesCS3B02G365100.1 | 192- 232 |                      |          |       |
| bZIP_251 | TraesCS3B02G368300.1 | 273- 317 |                      |          |       |
| bZIP_252 | TraesCS3B02G404200.1 | 306- 362 |                      |          |       |
| bZIP_253 | TraesCS3B02G404300.1 | 307- 355 |                      |          |       |
| bZIP_254 | TraesCS3B02G404400.1 | 307- 351 |                      |          |       |
| bZIP_255 | TraesCS3B02G404600.1 | 307- 354 |                      |          |       |
| bZIP_256 | TraesCS3B02G404800.2 | 261- 295 |                      |          |       |
| bZIP_257 | TraesCS3B02G404500.1 | 308- 351 |                      |          |       |
| bZIP_258 | TraesCS4D02G180200.4 | 53 - 92  |                      |          |       |

*Oryza sativa* (rice)

| Gene ID        | Group        |
|----------------|--------------|
| LOC_Os02g03580 | 244-306 GrpG |
| LOC_Os02g58670 | 67-127 GrpA  |
| LOC_Os03g13614 | 299-361 GrpG |
| LOC_Os03g56010 | 65-114 GrpS  |
| LOC_Os03g59460 | 200-226 GrpG |
| LOC_Os05g49420 | 245-307 GrpG |
| LOC_Os07g03220 | 72-122 GrpS  |
| LOC_Os07g10890 | 265-327 GrpG |
| LOC_Os11g05640 | 124-186 GrpG |
| LOC_Os12g13170 | 294-356 GrpG |
| LOC_Os12g43790 | 60-108 GrpS  |
| LOC_Os01g07880 | 109-170 GrpH |
| LOC_Os01g46970 | 224-285 GrpG |
| LOC_Os02g10860 | 172-233 GrpH |
| LOC_Os03g19370 | 22-71 GrpS   |
| LOC_Os06g39960 | 104-163 GrpH |
| LOC_Os07g08420 | 235-289 GrpC |
| LOC_Os08g38020 | 119-178 GrpS |
| LOC_Os09g29820 | 76-131 GrpS  |
| LOC_Os09g31390 | 201-243 GrpD |

*Arabidopsis thaliana* (Arabidopsis)

| Gene ID           | Group |
|-------------------|-------|
| AT_Q9C5Q2_192_234 | GrpA  |
| AT_Q9LES3_227_270 | GrpA  |
| AT_Q84JK2_216_265 | GrpA  |
| AT_Q7PCC6_164_213 | GrpA  |
| AT_Q9M7Q5_313_369 | GrpA  |
| AT_Q9M7Q3_374_430 | GrpA  |
| AT_Q9M7Q2_353_405 | GrpA  |
| AT_Q9SJN0_357_405 | GrpA  |
| AT_Q8RYD6_249_301 | GrpA  |
| AT_P42777_186_247 | GrpA  |
| AT_Q9FMM7_294_344 | GrpD  |
| AT_Q9SI15_31_82   | GrpS  |
| AT_O65683_26_67   | GrpS  |
| AT_C0Z2L5_41_81   | GrpS  |
| AT_Q9LZP8_25_83   | GrpS  |
| AT_Q9FMC2_72_118  | GrpS  |
| AT_Q9CA46_46_100  | GrpS  |
| AT_Q9FUD3_120_166 | GrpC  |
| AT_O22763_215_269 | GrpC  |
| AT_Q9M1G6_230_283 | GrpC  |

|                        |      |                   |      |
|------------------------|------|-------------------|------|
| LOC_Os01g64730 184-242 | GrpA | AT_B9DGI8_152_199 | GrpC |
| LOC_Os02g49560 78-132  | GrpS | AT_Q9LQ65_49_96   | GrpS |
| LOC_Os04g54474 104-144 | GrpD | AT_Q501B2_304_365 | GrpG |
| LOC_Os05g34050 172-232 | GrpB | AT_Q84LG2_293_355 | GrpG |
| LOC_Os05g36160 186-237 | GrpA | AT_P42774_220_282 | GrpG |
| LOC_Os05g41540 69-117  | GrpF | AT_P42775_247_309 | GrpG |
| LOC_Os06g45140 134-186 | GrpC | AT_P42776_257_319 | GrpG |
| LOC_Os07g44950 111-171 | GrpB | AT_P43273_46_86   | GrpD |
| LOC_Os08g07970 107-142 | GrpD | AT_Q39163_46_86   | GrpD |
| LOC_Os08g26880 36-95   | GrpS | AT_Q39140_46_86   | GrpD |
| LOC_Os09g13570 29-77   | GrpS | AT_Q93XM6_177_218 | GrpD |
| LOC_Os01g17260 44-85   | GrpD | AT_E3VNM4_161_191 | GrpD |
| LOC_Os01g64020 228-259 | GrpD | AT_Q9SX27_166_206 | GrpD |
| LOC_Os02g03960 36-78   | GrpS | AT_Q93ZE2_92_134  | GrpD |
| LOC_Os02g07840 123-172 | GrpC | AT_Q39237_82_113  | GrpD |
| LOC_Os02g10140 134-174 | GrpD | AT_Q39162_78_108  | GrpD |
| LOC_Os02g16680 142-191 | GrpC | AT_Q9M2K4_204_248 | GrpE |
| LOC_Os05g37170 230-260 | GrpD | AT_O22873_150_208 | GrpD |
| LOC_Os06g41770 210-267 | GrpB | AT_Q04088_203_255 | GrpD |
| LOC_Os06g42690 69-128  | GrpS | AT_Q9MA75_196_254 | GrpD |
| LOC_Os06g50480 96-143  | GrpA | AT_O24646_86_147  | GrpH |
| LOC_Os06g50600 96-152  | GrpA | AT_Q8W191_77_136  | GrpF |
| LOC_Os06g50830 96-152  | GrpA | AT_O22208_227_288 | GrpB |
| LOC_Os09g36910 125-178 | GrpA | AT_Q9LXX4_172_231 | GrpB |
| LOC_Os12g37410 25-84   | GrpS | AT_Q9SG86_192_249 | GrpB |
| LOC_Os12g40920 115-169 | GrpC |                   |      |
| LOC_Os01g11350 190-240 | GrpE |                   |      |
| LOC_Os01g36220 42-99   | GrpS |                   |      |
| LOC_Os01g55150 139-184 | GrpE |                   |      |
| LOC_Os01g59350 187-222 | GrpD |                   |      |
| LOC_Os01g59760 265-308 | GrpA |                   |      |
| LOC_Os01g64000 304-350 | GrpA |                   |      |
| LOC_Os02g09830 74-120  | GrpS |                   |      |
| LOC_Os02g14910 142-192 | GrpE |                   |      |
| LOC_Os02g52780 277-327 | GrpA |                   |      |
| LOC_Os03g03550 277-335 | GrpI |                   |      |
| LOC_Os03g20310 49-79   | GrpD |                   |      |
| LOC_Os03g20650 162-203 | GrpA |                   |      |
| LOC_Os03g21800 134-180 | GrpI |                   |      |
| LOC_Os03g47200 52-93   | GrpS |                   |      |
| LOC_Os03g58250 234-285 | GrpC |                   |      |
| LOC_Os04g41820 270-328 | GrpI |                   |      |
| LOC_Os05g03860 25-79   | GrpS |                   |      |
| LOC_Os05g41070 265-308 | GrpA |                   |      |
| LOC_Os06g10880 244-296 | GrpA |                   |      |
| LOC_Os06g15480 95-135  | GrpD |                   |      |
| LOC_Os06g41100 149-177 | GrpD |                   |      |
| LOC_Os07g48180 175-220 | GrpI |                   |      |

|                        |      |
|------------------------|------|
| LOC_Os07g48660 183-225 | GrpA |
| LOC_Os07g48820 50-91   | GrpD |
| LOC_Os08g36790 243-295 | GrpA |
| LOC_Os08g43090 322-380 | GrpI |
| LOC_Os08g43600 72-122  | GrpA |
| LOC_Os09g10840 189-218 | GrpD |
| LOC_Os09g28310 297-347 | GrpA |
| LOC_Os09g34060 183-241 | GrpI |
| LOC_Os10g38820 248-306 | GrpI |
| LOC_Os11g05480 180-209 | GrpD |
| LOC_Os11g06170 162-209 | GrpI |
| LOC_Os12g06520 164-221 | GrpI |
| LOC_Os12g05680 184-212 | GrpD |
| LOC_Os05g41280 24-63   | GrpD |
| LOC_Os06g50310 97-142  | GrpF |

**Supplementary Table S3. bZIP transcription factor proteins - proposed functionalities, processes and cellular components based on Gene Ontology results.**

| <b>bZIP</b> | <b>Gene</b>        | <b>Functional name</b>                     | <b>Molecular function</b>                                                                                                                                                           | <b>Biological process</b>                                                                                                                                                                                                  | <b>Cellular component</b> |
|-------------|--------------------|--------------------------------------------|-------------------------------------------------------------------------------------------------------------------------------------------------------------------------------------|----------------------------------------------------------------------------------------------------------------------------------------------------------------------------------------------------------------------------|---------------------------|
| ABF2        | TraesCS5D02G244500 | bZIP transcription factor TRAB1            | transcription regulatory region sequence-specific DNA binding,<br><br>DNA-binding transcription factor activity                                                                     | regulation of transcription, DNA-templated, abscisic acid-activated signalling pathway, positive regulation of transcription                                                                                               | nucleus                   |
| ABF4        | TraesCS5A02G237200 | bZIP transcription factor TRAB1            | transcription regulatory region sequence-specific DNA binding<br><br>DNA-binding transcription factor activity                                                                      | abscisic acid-activated signalling pathway<br><br>regulation of transcription, DNA-templated, positive regulation of transcription                                                                                         | nucleus                   |
| ABI5        | TraesCS1A02G306300 | ABSCISIC ACID-INSENSITIVE 5-like protein 2 | DNA-binding transcription factor activity<br><br>DNA binding                                                                                                                        | positive regulation of transcription,<br><br>DNA-templated<br><br>response to abscisic acid, abscisic acid-activated signalling pathway                                                                                    | nucleus                   |
| EMBP-1      | TraesCS2B02G269600 | DNA-binding protein EMBP-1                 | DNA-binding transcription factor activity,<br><br>sequence-specific DNA binding                                                                                                     | regulation of transcription, DNA-templated abscisic acid-activated signalling pathway                                                                                                                                      | nucleus                   |
| VIP1        | TraesCS5B02G124200 | transcription factor VIP1                  | nucleic acid binding<br><br>mitogen-activated protein kinase binding<br><br>chromatin binding<br><br>DNA-binding transcription factor activity<br><br>sequence-specific DNA binding | defence response, thigmotropism response to osmotic stress, osmosensory signalling pathway,<br><br>sulphate transport, DNA mediated transformation<br><br>import into nucleus, negative regulation of cell differentiation | nucleus<br><br>cytosol    |

|  |  |  |                              |  |  |
|--|--|--|------------------------------|--|--|
|  |  |  | protein self-<br>association |  |  |
|--|--|--|------------------------------|--|--|
